# Supplementary material for: Hybrid sol–gel inorganic/gelatin porous fibres via solution blow spinning
Source: Springer Nature journal article supplement (doi:10.1007/s10853-017-0868-1), 2017-03-08
Supplement: MOESM1 [file 12128604]

**Supplementary Material**

**Hybrid sol-gel inorganic/gelatin porous fibres via solution blow spinning**

Ryan D. Greenhalgh1#, William S. Ambler1,2#, Stephen J. Quinn1, Eliton S. Medeiros3, Michael Anderson4, Barbara Gore4, Angelika Menner5, Alexander Bismarck5, Xu Li2, Nicola Tirelli6, Jonny J. Blaker1*

1*Bio-Active Materials Group, School of Materials, MSS Tower, The University of Manchester, Manchester, M13 9PL, UK

2Institute of Materials Research and Engineering (IMRE), Agency for Science, Technology and Research (A*STAR), 2 Fusionopolis Way, Innovis, #08-03, 138634, Singapore

3Materials and Biosystems Laboratory (LAMAB), Department of Materials Engineering (DEMat), Federal University of Paraíba (UFPB), CEP58051-900, João Pessoa- PB, Brazil

4School of Chemistry, The University of Manchester, Brunswick Street, Manchester, M13 9PL, UK

5Polymer and Composite Engineering (PaCE) Group, Institute of Materials Chemistry and Research, Faculty of Chemistry, University of Vienna, Währingerstr. 42, A-1090 Vienna, Austria

6Division of Pharmacy and Optometry, School of Health Sciences, The University of Manchester, Stopford Building, Oxford Road, Manchester, M13 9PT, UK

#Joint first Authors due to equal contribution

Corresponding Author: *jonny.blaker@manchester.ac.uk

**Table S1.** Sol-gel precursor solution typical volumes used according to molar ratios given in the article

| Sol precursor solutions | TEOS  [mL] | EtOH  [mL] | TBA  [mL] | H2O  [mL] | 1M HCl  [μL] |
| --- | --- | --- | --- | --- | --- |
| Neat sol-gel | 17.1 | 2 | - | 2 | 57 |
| Class I hybrid for conventional SBS | 5.7 | 1.03 | - | 0.73*Including H2O from 1M HCl | 300 |
| Class I and II hybrid for cryo-SBS | 2.216 | - | 4.782 | *Water from 1M HCl | 500 |

**
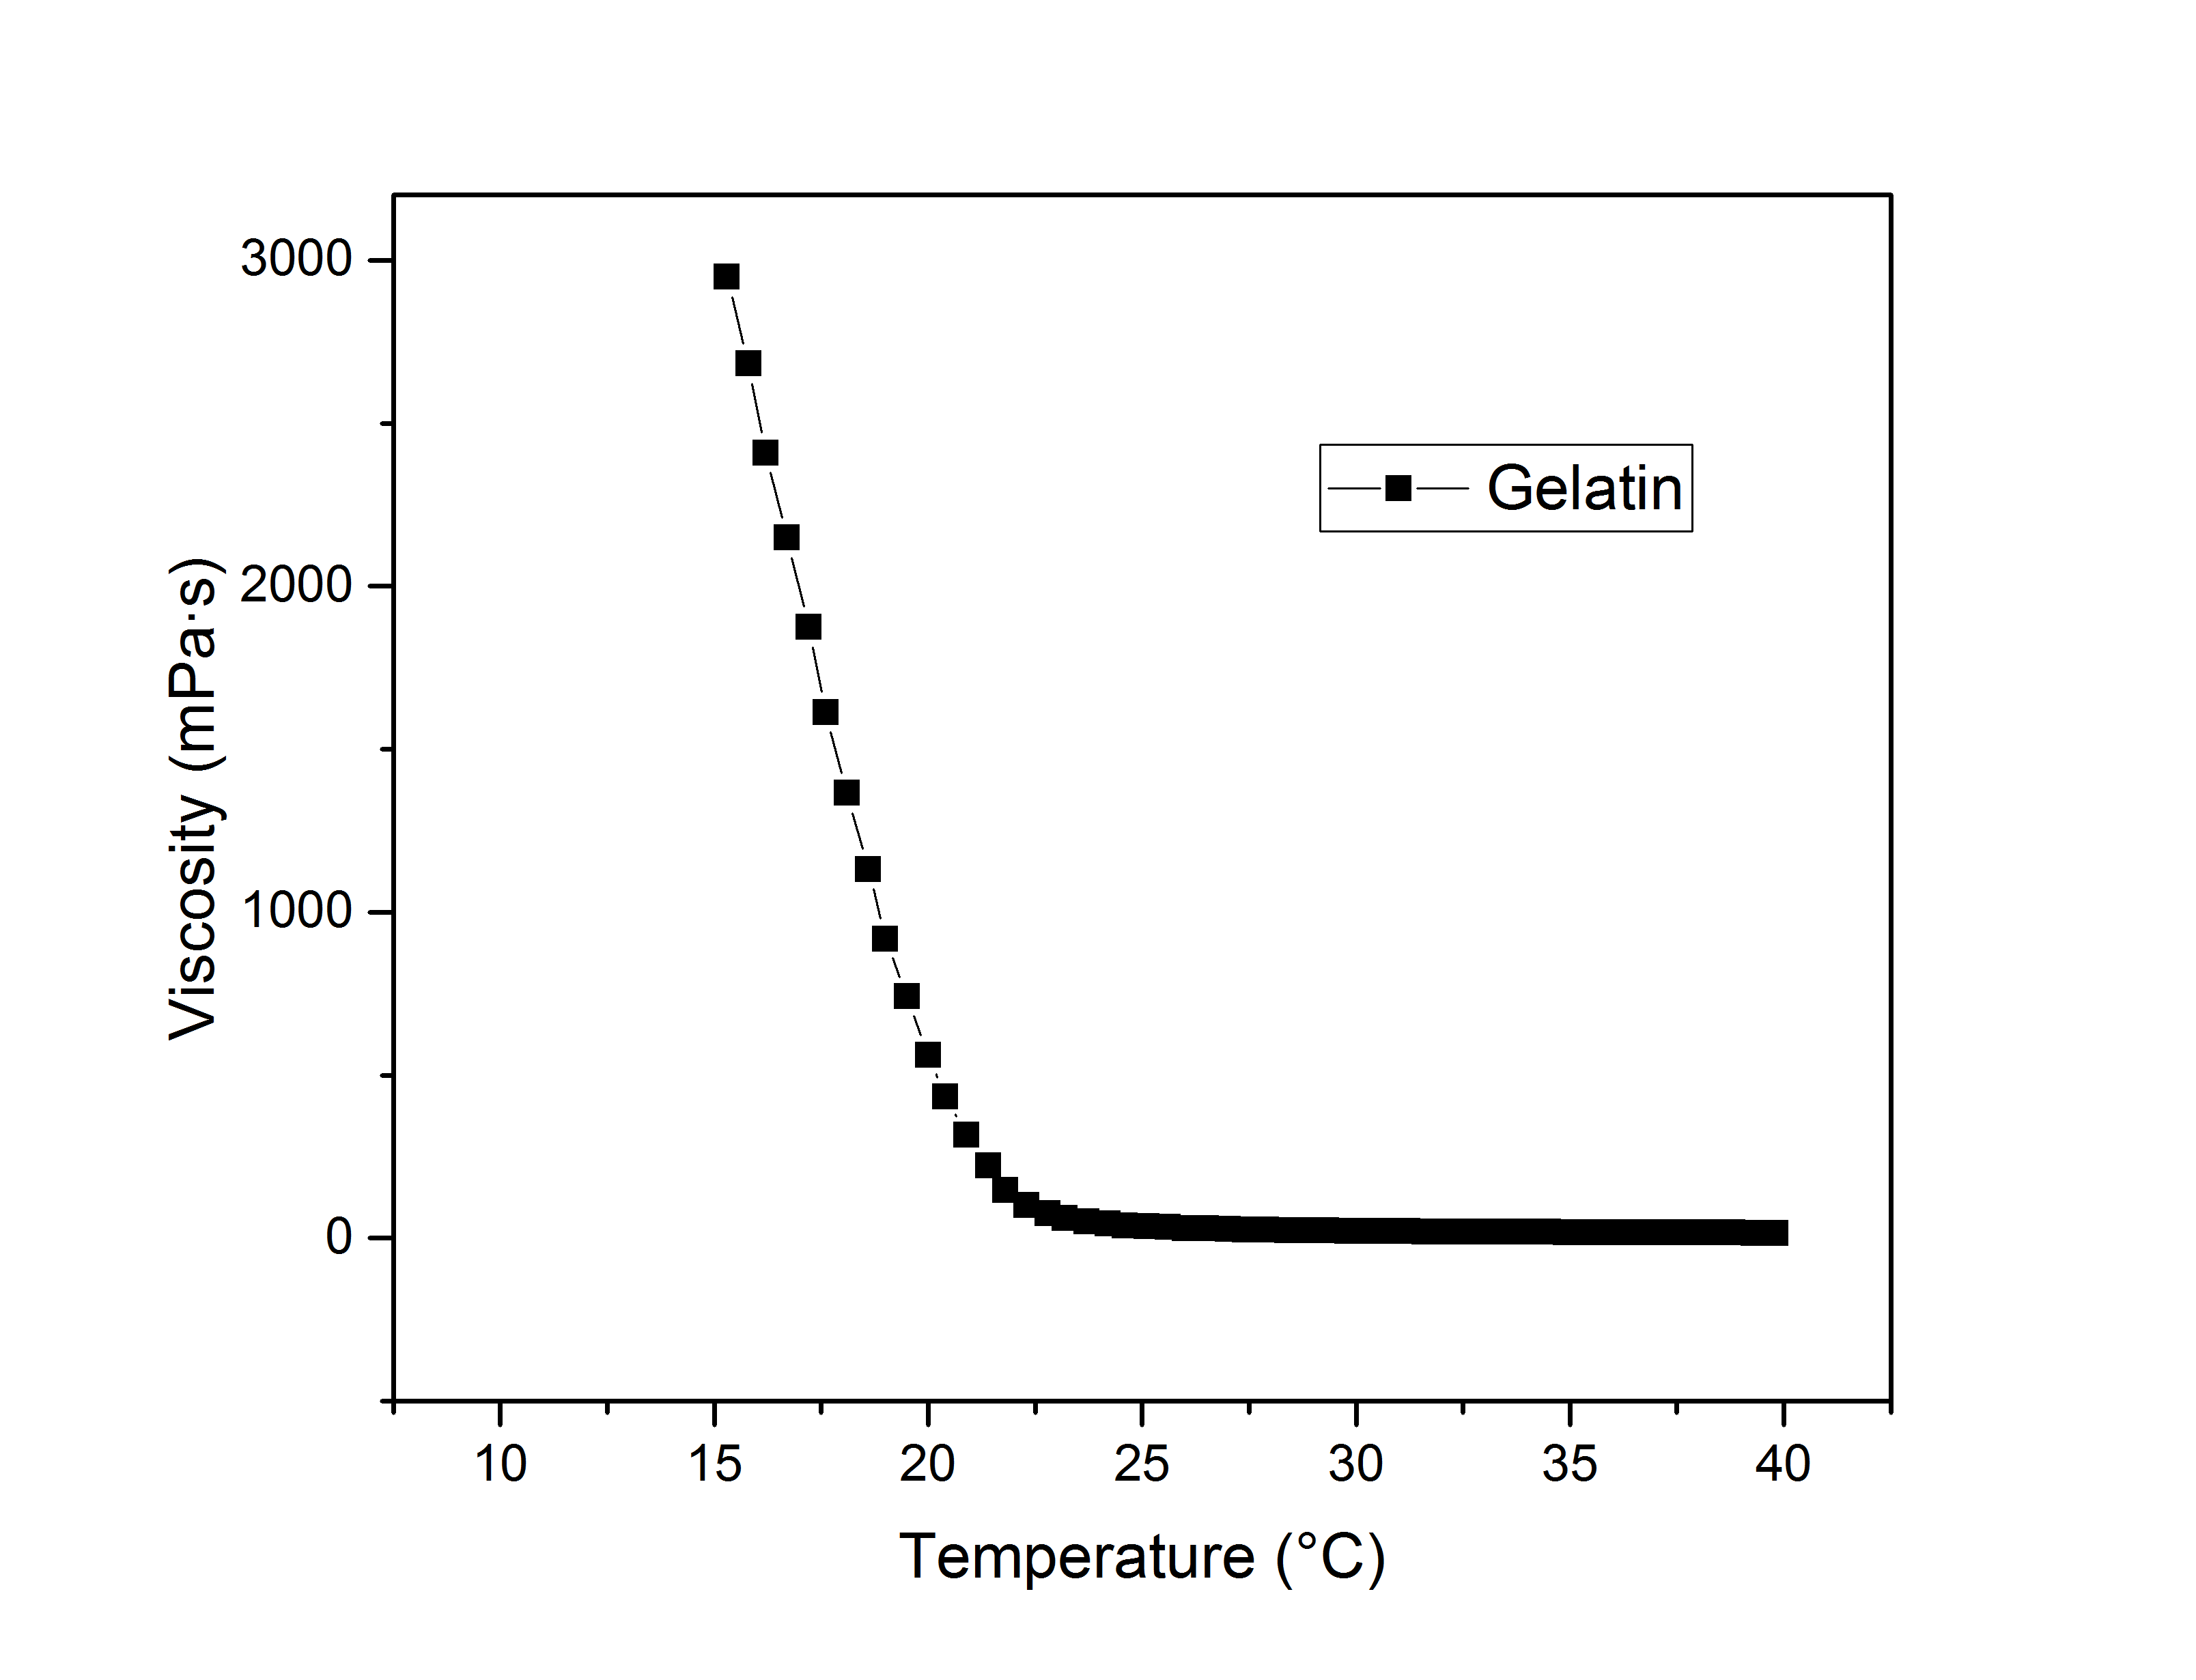
**

**Fig. S1** Viscosity of gelatin (10% w/v in PBS) as function of temperature, measured at constant shear stress of 500 s-1, showing the sol-gel transition
